# Supplementary material
Source: Copernicus journal article supplement (doi:10.5194/acp-26-6133-2026)
Supplement: Supplementary file 1 [file acp-26-6133-2026-supplement.pdf]

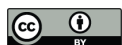

*Supplement of*

**Measurement report: Assessing the ammonia characteristics over a high-altitude mountain site in Shanxi province, China: a comparison with the observations in the North China Plain**

**Weiwei Pu et al.**

*Correspondence to:* Jing Xu (jxu07@126.com) and Zhiqiang Ma (zqma@ium.cn)

The copyright of individual parts of the supplement might differ from the article licence.

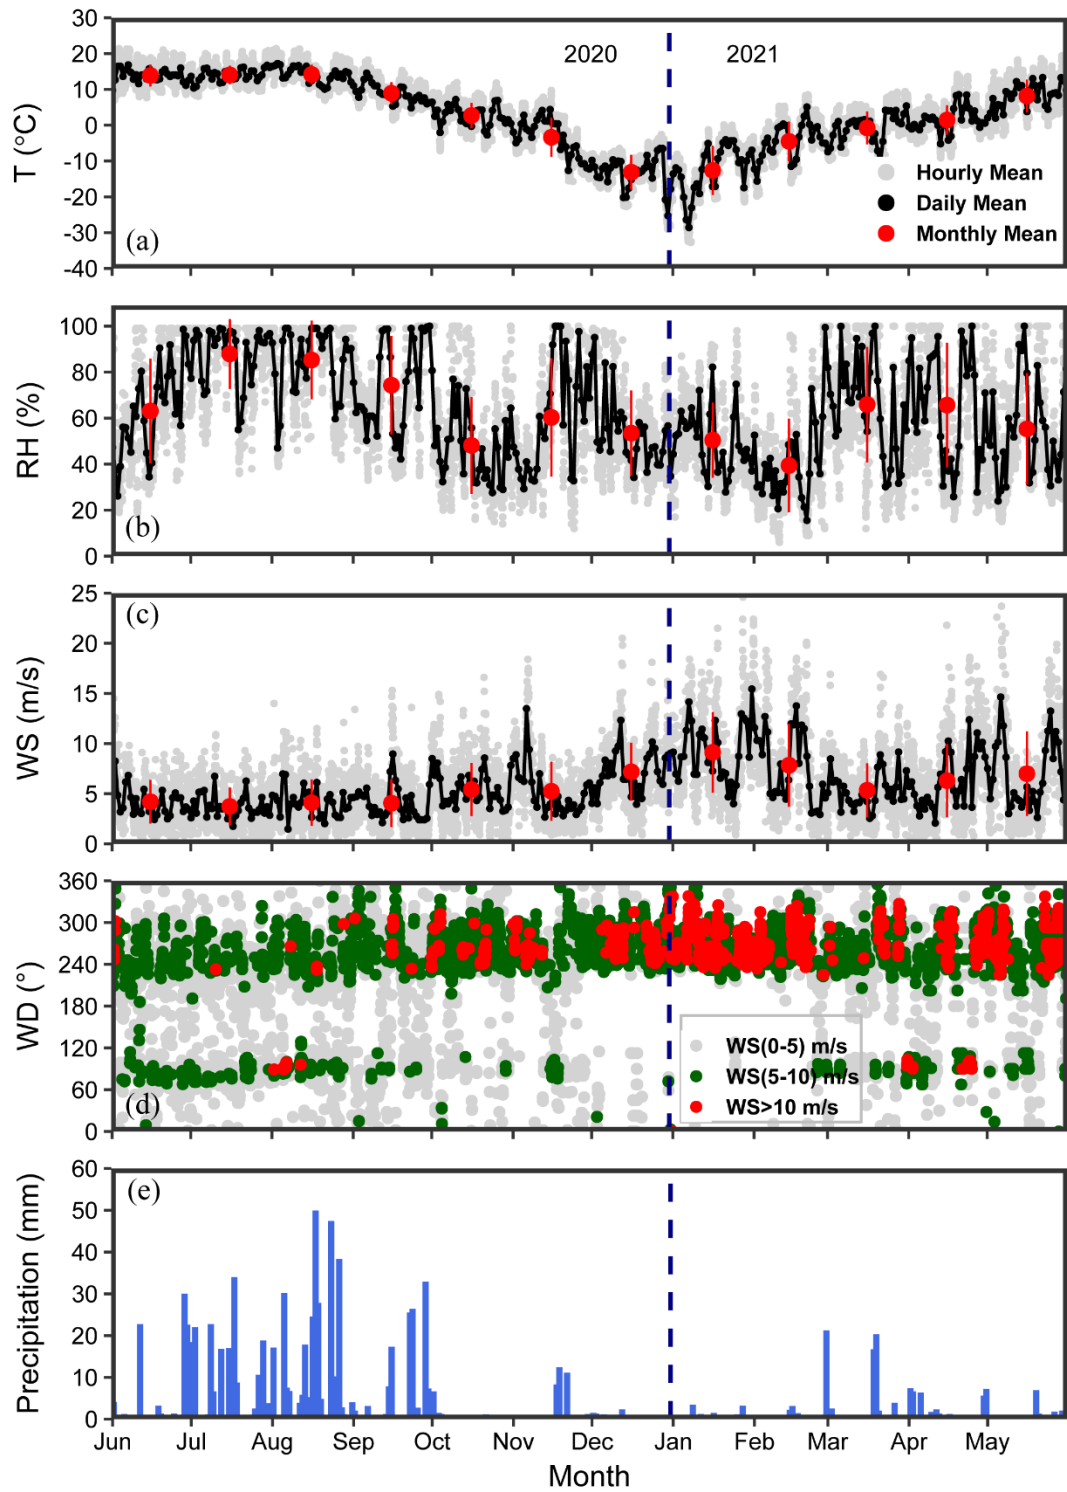

Fig. S1. Observed meteorological variables from the site: T (a), RH (b), WS (c), WD (d), and daily precipitation (e).

Table S1 Statistics of NH<sub>3</sub> at WTS for all four seasons.

| Period | Mean | SD  | Minimum | P25  | Medium | P75  | Maximum |
|--------|------|-----|---------|------|--------|------|---------|
| All    | 9.0  | 6.7 | 0.1     | 3.5  | 7.7    | 12.7 | 52.7    |
| Spring | 8.9  | 6.3 | 2.7     | 5.0  | 7.5    | 10.6 | 52.7    |
| Summer | 15.9 | 5.4 | 6.1     | 11.7 | 15.4   | 19.6 | 35.6    |
| Autumn | 8.8  | 4.2 | 2.2     | 5.7  | 8.1    | 11.4 | 22.4    |
| Winter | 2.1  | 1.2 | 0.14    | 1.5  | 2.0    | 2.4  | 8.2     |

Table S2 Comparison of NH<sub>3</sub> concentrations at different high-altitude sites.

| Site Name                         | Land use types         | Altitude (m) and Location | Observation Period  | Sampler type | NH <sub>3</sub> (ppb) | Reference              |
|-----------------------------------|------------------------|---------------------------|---------------------|--------------|-----------------------|------------------------|
| WTM, China                        | Mountain and forest    | 2208 (38.95°N, 113.52°E)  | Jun 2020 – May 2021 | online       | 9.0 ± 6.7             | This study             |
| Waliguan, China                   | Grassland              | 3372 (36.30°N, 100.90°E)  | Sep 2015 – Aug 2016 | offline      | 3.0                   | Pan et al. (2018)      |
| Ailaoshan, China                  | Mountain and forest    | 2483 (24.30°N, 101.00°E)  | Sep 2015 – Aug 2016 | offline      | 2.0                   | Pan et al. (2018)      |
| Gongashan, China                  | Mountain and forest    | 2977 (29.60°N, 102.00°E)  | Sep 2015 – Aug 2016 | offline      | 2.6                   | Pan et al. (2018)      |
| Maoxian, China                    | Mountain and shrubbery | 1826 (31.70°N, 103.90°E)  | Sep 2015 – Aug 2016 | offline      | 3.7                   | Pan et al. (2018)      |
| Wuwei, China                      | Rural                  | 1503 (102.60°N, 38.07°E)  | Jun 2015            | offline      | 26.5                  | Xu et al. (2019)       |
| Bayingbuluke, China               | Grassland              | 2470 (83.71°N, 42.88°E)   | Jun 2011            | offline      | 4.0                   | Xu et al. (2019)       |
| Louisville, USA                   | Suburban               | 1698 (39.99°N, 105.15°W)  | Jun – Aug 2011      | offline      | 4.8                   | Li et al. (2017)       |
| Greeley, USA                      | Suburban-agricultural  | 1492 (40.39°N, 104.75°W)  | May – Sep 2015      | offline      | 16.7                  | Li et al. (2017)       |
| Kersey, USA                       | Rural-agricultural     | 1403 (40.28°N, 104.53°W)  | May – Sep 2015      | offline      | 79.4                  | Li et al. (2017)       |
| Rocky Mountain National Park, USA | Mountain and forest    | 2784 (40.28°N, 105.55°W)  | Jul – Aug 2006      | offline      | 0.6                   | Benedict et al. (2013) |
| Beaver Meadows, USA               | /                      | 2509 (40.36°N, 105.58°W)  | Jul – Aug 2006      | offline      | 0.7                   | Benedict et al. (2013) |
| Timber Creek, USA                 | /                      | 2767 (40.38°N, 105.85°W)  | Jul – Aug 2006      | offline      | 0.3                   | Benedict et al. (2013) |
| Gore Pass, USA                    | /                      | 2641 (40.12°N, 106.53°W)  | Jul – Aug 2006      | offline      | 0.4                   | Benedict et al. (2013) |
| Happo, Japan                      | Mountain and forest    | 1850 (36.69°N, 137.80°W)  | 2003 – 2012         | offline      | 0.4                   | Ban et al. (2016)      |

Table S3 Statistical parameters of WTM, SDZ and BMS.

| Site        | DTW    | Euclidean distance | r    | RMSD | MAB  |
|-------------|--------|--------------------|------|------|------|
| WTM and SDZ | 725.2  | 81.9               | 0.74 | 4.5  | 3.0  |
| WTM and BMS | 2140.7 | 265.2              | 0.67 | 15.7 | 11.7 |

### The causality influence of individual meteorological factors on NH<sub>3</sub> concentration.

By applying the CCM method to two time-series variables, their coupling could be understood based on an output convergent map. If the interaction between two variables is featured using generally convergent curves with increasing time series length, then the causality is detected. On the contrary, if the interaction between the two variables is featured as curves without any general trend, then there is no causality between the two variables. The predictive skills  $\rho$ -value is a direct indicator of quantitative causality, ranging from 0 to 1, and presents the strength of the impacts from one variable on another variable.

In the CCM algorithm, the parameter E (embedding dimension) of different meteorological factors in this study was adopted at different values depending on the relations of embedding dimension and  $\rho$ -value. The E value that could indicate the dynamics of data unfolded best was selected.  $\tau$  (time lag) was set to 1 to create a shadow manifold. Our result was iterated 100 times to get an optimum result and then tested for the significance of the causal signal. If  $\rho$  is convergent to a certain value (in other words,  $\Delta\rho$  is approaching 0) with increasing time series, then the causality is detected and the ultimate  $\rho$  value for the coupling is set as the convergent constant.

As Fig.S2 demonstrates, the coupling between meteorological factors and NH<sub>3</sub> concentration can be bidirectional. However, we just focus on the direction of influence from meteorological parameters to NH<sub>3</sub> concentration in this study.

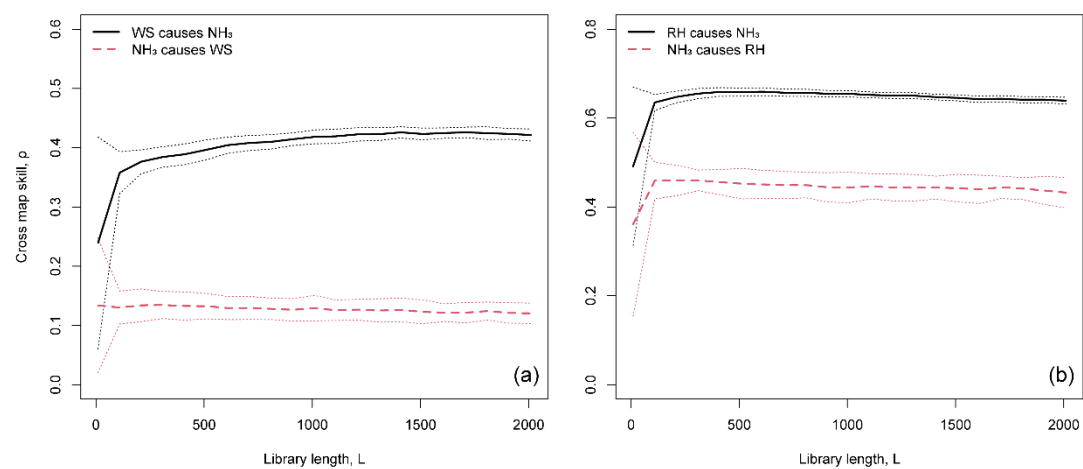

Fig.S2. Convergence cross mapping plot sample, showing the variation of bidirectional predictive skill value ( $\rho$ ) and length of data time series (L) (a) NH<sub>3</sub> vs WS, (b) NH<sub>3</sub> vs RH. The dot lines represent  $\pm 1$  standard errors.

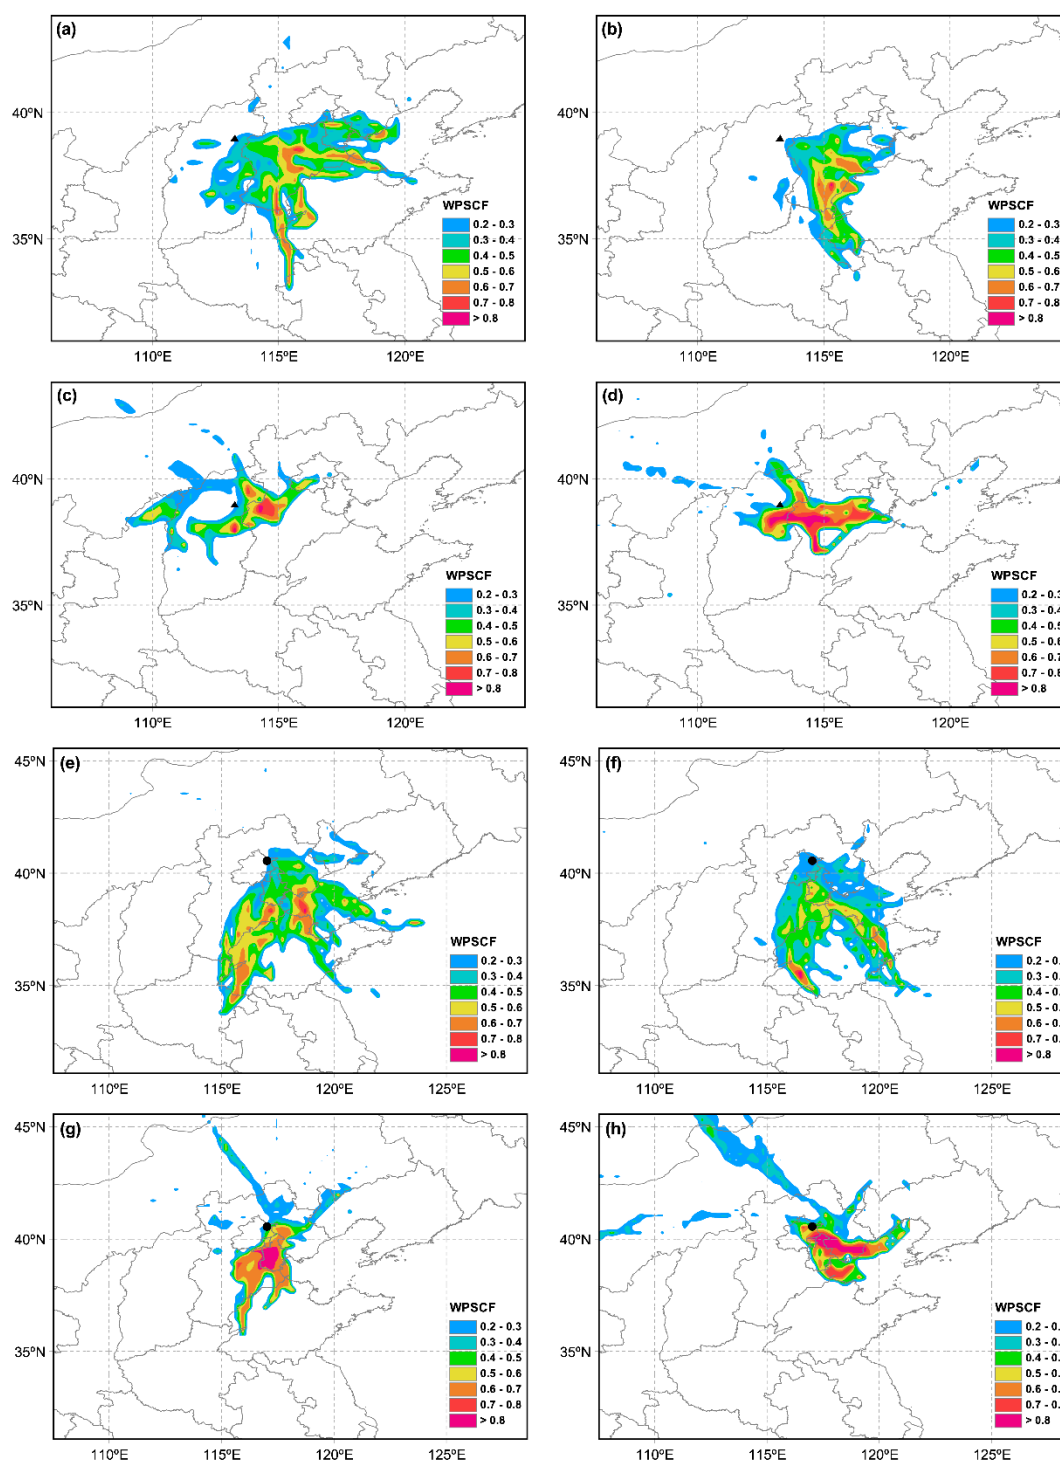

Fig. S3. Potential source contribution analysis of  $\text{NH}_3$  in different seasons. (a), (b), (c), and (d) are the PSCF maps of WTM in four seasons, respectively. (e), (f), (g), and (h) are the results of SDZ in four seasons, respectively.

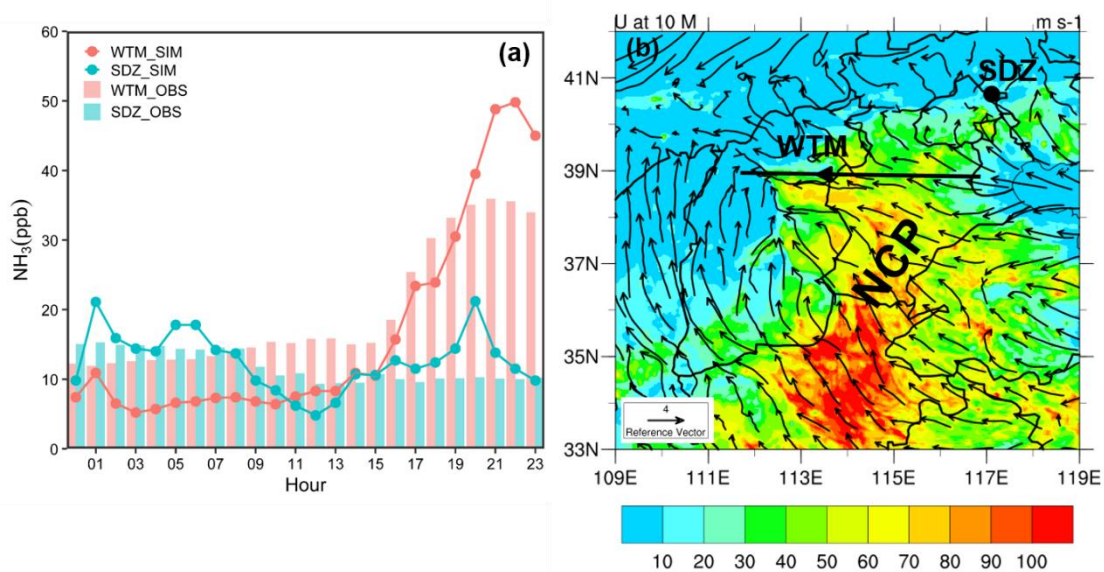

Fig. S4. Diurnal variation of observed and simulated  $\text{NH}_3$  concentration (a) and spatial distribution of simulated concentration of  $\text{NH}_3$  (unit: ppb) and wind vectors at the surface layer at 19:00 May 12, 2021 (b). The black solid lines represent the locations of the selected vertical cross sections discussed below. The black triangle and dot indicate the location of WTM and SDZ sites, respectively.

#### References:

- Ban, S., Matsuda, K., Sato, K., and Ohizumi, T.: Long-term assessment of nitrogen deposition at remote EANET sites in Japan, *Atmospheric Environment*, 146, 70-78, <https://doi.org/10.1016/j.atmosenv.2016.04.015>, 2016.
- Benedict, K. B., Day, D., Schwandner, F. M., Kreidenweis, S. M., Schichtel, B., Malm, W. C., and Collett, J. L.: Observations of atmospheric reactive nitrogen species in Rocky Mountain National Park and across northern Colorado, *Atmospheric Environment*, 64, 66-76, <https://doi.org/10.1016/j.atmosenv.2012.08.066>, 2013.
- Li, Y., Thompson, T. M., Van Damme, M., Chen, X., Benedict, K. B., Shao, Y., Day, D., Boris, A., Sullivan, A. P., Ham, J. J. A. C., and Physics: Temporal and spatial variability of ammonia in urban and agricultural regions of northern Colorado, United States, 17, 1-50, 2017.
- Pan, Y., Tian, S., Zhao, Y., Zhang, L., Zhu, X., Gao, J., Huang, W., Zhou, Y., Song, Y., Zhang, Q., and Wang, Y.: Identifying Ammonia Hotspots in China Using a National Observation Network, *Environmental Science & Technology*, 52, 3926-3934, [10.1021/acs.est.7b05235](https://doi.org/10.1021/acs.est.7b05235), 2018.
- Xu, W., Zhang, L., and Liu, X.: A database of atmospheric nitrogen concentration and deposition from the nationwide monitoring network in China, *Scientific Data*, 6, 51, [10.1038/s41597-019-0061-2](https://doi.org/10.1038/s41597-019-0061-2), 2019.
